# Supplementary material for: Die Auswirkungen von Feedback auf Lernbereitschaft und Wechseltendenz von Arbeitnehmern und Studierenden
Source: Springer Nature journal article supplement (doi:10.1007/s11612-024-00722-y), 2024-02-19
Supplement: MOESM1 [file 26752032]

---

## Anhang

### Fragebogen

#### Start

Welcher Tätigkeit gehen Sie aktuell nach?\*

Ich bin...

Bitte wählen Sie nur eine der folgenden Antworten aus:

- ☐ Schüler/ Schülerin.
- ☐ Student/ Studentin.
- ☐ Auszubildender/ Auszubildende.
- ☐ Arbeitnehmer/ Arbeitnehmerin.
- ☐ Sonstiges

---

## Abschnitt A

Demographische Daten zur Person

Wie alt sind Sie? \*

*In dieses Feld dürfen nur Zahlen eingegeben werden.  
Ihre Antwort muss zwischen 14 und 110 liegen.*

- \_\_\_\_\_

Welches Geschlecht haben Sie?

Bitte wählen Sie nur eine der folgenden Antworten aus:

- ☐ weiblich
- ☐ männlich

Wie ist Ihr Familienstand?

Bitte wählen Sie nur eine der folgenden Antworten aus:

- ☐ ledig
- ☐ verheiratet, zusammenlebend
- ☐ verheiratet, getrennt lebend
- ☐ geschieden
- ☐ verwitwet
- ☐ in einer Partnerschaft lebend
- ☐ Sonstiges

Wie ist Ihr derzeitiges Wohnverhältnis?

Ich lebe...

*\*Beantworten Sie diese Frage nur, wenn folgende Bedingungen erfüllt sind:  
Antwort war 'ledig' bei Frage '4 [A4]' (Wie ist Ihr Familienstand?)*

Bitte wählen Sie nur eine der folgenden Antworten aus:

- ☐ ...allein.

- 
- ☐...bei meinen Eltern.
  - ☐...in einer WG/ in einem Studentenwohnheim.
  - ☐Sonstiges

Haben Sie einen festen Partner?

*\*Beantworten Sie diese Frage nur, wenn folgende Bedingungen erfüllt sind:*

*Antwort war 'ledig' oder 'geschieden' oder 'verwitwet' oder 'Sonstiges' bei Frage '4 [A4]'*

*(Wie ist Ihr Familienstand?)*

Bitte wählen Sie nur eine der folgenden Antworten aus:

- ☐Ja
- ☐Nein

Haben Sie Kinder?

Bitte wählen Sie nur eine der folgenden Antworten aus:

- ☐Ja
- ☐Nein

Wo wohnen Sie derzeit?

Bitte wählen Sie nur eine der folgenden Antworten aus:

- ☐Großstadt
- ☐Kleinstadt
- ☐Dorf
- ☐Sonstiges

In welchem Bereich sind Sie aktuell tätig bzw. welchem Bereich ist Ihr Studienfach zuzuordnen?

*\*Bitte beziehen Sie ihre Antwort auf Ihre aktuelle Position im Unternehmen. \**

Bitte wählen Sie nur eine der folgenden Antworten aus:

- 
- ☐ Bau, Architektur, Vermessung
  - ☐ Dienstleistungen
  - ☐ Gesundheitswesen
  - ☐ IT
  - ☐ Kunst, Kultur, Gestaltung
  - ☐ Medien
  - ☐ Metall, Maschinenbau
  - ☐ Naturwissenschaften
  - ☐ Produktion/ Fertigung
  - ☐ Soziales/ Pädagogik
  - ☐ Elektro/ Technik
  - ☐ Verkehr/ Logistik
  - ☐ Wirtschaft/ Verwaltung
  - ☐ Handwerk
  - ☐ Sonstiges

## Abschnitt B

*In diesem Abschnitt werden Ihnen Fragen zu dem Feedback, welches Sie an Ihrer Arbeitsstelle / in Ihrem Studium erhalten, gestellt.*

Bitte geben Sie an, inwieweit Sie den folgenden Aussagen zustimmen.

Mein Vorgesetzte/r / meine Autoritätsperson...

\*Professoren/ Dozenten/ Lehrbeauftragte werden in dieser Umfrage als Autoritätsperson betrachtet.\*

Bitte wählen Sie die zutreffende Antwort für jeden Punkt aus:

|                                                                                                               | stimme gar<br>nicht zu | stimme<br>eher nicht<br>zu | weder/<br>noch        | stimme<br>eher zu     | stimme voll<br>zu     |
|---------------------------------------------------------------------------------------------------------------|------------------------|----------------------------|-----------------------|-----------------------|-----------------------|
| ...unterstützt mich<br>durch zeitnahes,<br>konstruktives<br>Feedback zu<br>meiner Arbeit/<br>meinen Aufgaben. | <input type="radio"/>  | <input type="radio"/>      | <input type="radio"/> | <input type="radio"/> | <input type="radio"/> |
| ...unterstützt<br>meine Arbeit,<br>indem während                                                              | <input type="radio"/>  | <input type="radio"/>      | <input type="radio"/> | <input type="radio"/> | <input type="radio"/> |

---

des laufenden  
Arbeitsprozesses  
informelles  
Feedback (nicht  
vorgeschriebenen,  
nicht formell,  
nicht  
organisatorisch  
geregelt) zu  
meiner Leistung  
gegeben wird.

---

...gibt mir bereits  
während des  
laufenden  
Arbeitsprozesses  
Feedback und  
nicht nur nach  
Abschluss eines  
Arbeitsprozesses  
(z.B. nach  
Projektende)

---

☐ ☐ ☐ ☐ ☐

...hilft mir, aus  
bisherigen  
Fehlern zu Lernen.

---

☐ ☐ ☐ ☐ ☐

*Im Folgenden geht es um die Häufigkeit, mit der Sie Feedback erhalten haben.  
Hierbei wird in geplantes Feedback (vorab vereinbartes oder periodisch  
wiederkehrendes Gespräch über Arbeitsleistung und Verhaltensweisen) und ungeplantes  
Feedback (spontane Rückmeldung, unregelmäßig) unterschieden.*

Wie häufig haben Sie in den letzten vier Wochen geplantes Feedback von Ihrer/m  
Vorgesetzten / Ihrer Autoritätsperson erhalten?

*\*Professoren/ Dozenten/ Lehrbeauftragte werden in dieser Umfrage als Autoritätsperson  
betrachtet.*

Bitte tragen Sie die Anzahl hier ein:\*

Ihre Antwort muss zwischen 0 und 60 liegen.  
In diesem Feld darf nur ein ganzzahliger Wert eingetragen werden.

Bitte geben Sie Ihre Antwort hier ein:

- \_\_\_\_\_

---

Wie häufig haben Sie in den letzten vier Wochen ungeplantes Feedback von Ihrer/m Vorgesetzten / Ihrer Autoritätsperson erhalten?

*\*Professoren/ Dozenten/ Lehrbeauftragte werden in dieser Umfrage als Autoritätsperson angesehen.*

Bitte tragen Sie die Anzahl hier ein: \*

In dieses Feld dürfen nur Zahlen eingegeben werden.  
Ihre Antwort muss zwischen 0 und 60 liegen.

Bitte geben Sie Ihre Antwort hier ein:

• \_\_\_\_\_

Bitte geben Sie an, inwieweit Sie den folgenden Aussagen zustimmen.

Meine Kollegen/ meine Kommilitonen... \*

Bitte wählen Sie die zutreffende Antwort für jeden Punkt aus:

|                                                                                                                                                        | stimme gar<br>nicht zu | stimme<br>eher nicht<br>zu | weder/<br>noch        | stimme<br>eher zu     | stimme voll<br>zu     |
|--------------------------------------------------------------------------------------------------------------------------------------------------------|------------------------|----------------------------|-----------------------|-----------------------|-----------------------|
| ...unterstützen mich durch zeitnahes, konstruktives Feedback zu meiner Arbeit/ meinen Aufgaben.                                                        | <input type="radio"/>  | <input type="radio"/>      | <input type="radio"/> | <input type="radio"/> | <input type="radio"/> |
| ...unterstützen meine Arbeit, indem während der Arbeit informelles Feedback (nicht vorgeschriebenen, nicht formell, nicht organisatorisch geregelt) zu | <input type="radio"/>  | <input type="radio"/>      | <input type="radio"/> | <input type="radio"/> | <input type="radio"/> |

|                                                                                                                                                                              |                       |                       |                       |                       |                       |
|------------------------------------------------------------------------------------------------------------------------------------------------------------------------------|-----------------------|-----------------------|-----------------------|-----------------------|-----------------------|
| meiner Leistung<br>gegeben wird.                                                                                                                                             |                       |                       |                       |                       |                       |
| ...geben mir<br>bereits während<br>des laufenden<br>Arbeitsprozesses<br>Feedback und<br>nicht nur nach<br>Abschluss eines<br>Arbeitsprozesses<br>(z.B. nach<br>Projektende). | <input type="radio"/> |
| ...helfen mir, aus<br>bisherigen<br>Fehlern zu lernen.                                                                                                                       | <input type="radio"/> |

Wie häufig haben Sie in den letzten vier Wochen geplantes Feedback von Ihren Kollegen/  
Ihren Kommilitonen erhalten?

Bitte tragen Sie die Anzahl hier ein: \*

*In dieses Feld dürfen nur Zahlen eingegeben werden.  
Ihre Antwort muss zwischen 0 und 60 liegen.*

• \_\_\_\_\_

Wie häufig haben Sie in den letzten vier Wochen ungeplantes Feedback von Ihren  
Kollegen/ Ihren Kommilitonen erhalten?

Bitte tragen Sie die Anzahl hier ein: \*

*In dieses Feld dürfen nur Zahlen eingegeben werden.  
Ihre Antwort muss zwischen 1 und 60 liegen.*

• \_\_\_\_\_

---

## Abschnitt C

*Dieser Abschnitt nimmt Bezug zu Ihrer Arbeitsstelle/ Ihrer Universität bzw. Hochschule und behandelt zudem das Thema Wissenszuwachs.*

Bitte geben Sie an, inwieweit Sie den folgenden Aussagen zustimmen. \*

Bitte wählen Sie die zutreffende Antwort für jeden Punkt aus:

|                                                                                                  | stimme gar<br>nicht zu | stimme<br>eher nicht<br>zu | weder/<br>noch        | stimme<br>eher zu     | stimme voll<br>zu     |
|--------------------------------------------------------------------------------------------------|------------------------|----------------------------|-----------------------|-----------------------|-----------------------|
| Manchmal denke ich daran, den Job oder das Unternehmen/ die Uni bzw. die Hochschule zu wechseln. | <input type="radio"/>  | <input type="radio"/>      | <input type="radio"/> | <input type="radio"/> | <input type="radio"/> |
| Ich habe schon öfter einen Berufswechsel/ Studiengangswechsel in Erwägung gezogen.               | <input type="radio"/>  | <input type="radio"/>      | <input type="radio"/> | <input type="radio"/> | <input type="radio"/> |
| Meine beruflichen/ studiumsbezogenen Ziele wechseln häufig.                                      | <input type="radio"/>  | <input type="radio"/>      | <input type="radio"/> | <input type="radio"/> | <input type="radio"/> |
| Ich gebe meine beruflichen/ studiumsbezogenen Ziele häufig auf und strebe andere Ziele an.       | <input type="radio"/>  | <input type="radio"/>      | <input type="radio"/> | <input type="radio"/> | <input type="radio"/> |
| Meine Ausdauer im Beruf/ Studium ist eher gering.                                                | <input type="radio"/>  | <input type="radio"/>      | <input type="radio"/> | <input type="radio"/> | <input type="radio"/> |
| Ich suche mir häufig neue Tätigkeitsfelder.                                                      | <input type="radio"/>  | <input type="radio"/>      | <input type="radio"/> | <input type="radio"/> | <input type="radio"/> |
| Ich achte auf berufliche/ studiumsbezogene Kontinuität.                                          | <input type="radio"/>  | <input type="radio"/>      | <input type="radio"/> | <input type="radio"/> | <input type="radio"/> |
| Ich kann <u>nicht</u> lange bei einer Sache bleiben.                                             | <input type="radio"/>  | <input type="radio"/>      | <input type="radio"/> | <input type="radio"/> | <input type="radio"/> |

Bitte geben Sie an, inwieweit die folgenden Aussagen auf Sie zutreffen. \*

Bitte wählen Sie die zutreffende Antwort für jeden Punkt aus:

[illegible]





---

Bitte geben Sie an, inwieweit die folgenden Aussagen auf Sie zutreffen. \*

Bitte wählen Sie die zutreffende Antwort für jeden Punkt aus:

|                                                                                                                                                         | stimme gar<br>nicht zu | stimme<br>eher nicht<br>zu | weder/<br>noch        | stimme<br>eher zu     | stimme voll<br>zu     |
|---------------------------------------------------------------------------------------------------------------------------------------------------------|------------------------|----------------------------|-----------------------|-----------------------|-----------------------|
| Mein Beruf/ mein<br>Studium gibt mir<br>persönlich etwas.                                                                                               | <input type="radio"/>  | <input type="radio"/>      | <input type="radio"/> | <input type="radio"/> | <input type="radio"/> |
| Ich bin mit meiner<br>Arbeit/meinem<br>Studium zufrieden.                                                                                               | <input type="radio"/>  | <input type="radio"/>      | <input type="radio"/> | <input type="radio"/> | <input type="radio"/> |
| Meine Arbeit/<br>mein Studium<br>macht mir Spaß.                                                                                                        | <input type="radio"/>  | <input type="radio"/>      | <input type="radio"/> | <input type="radio"/> | <input type="radio"/> |
| Mit meiner<br>Arbeitsleistung/<br>meiner Leistung im<br>Studium bin ich<br>zufrieden.                                                                   | <input type="radio"/>  | <input type="radio"/>      | <input type="radio"/> | <input type="radio"/> | <input type="radio"/> |
| Mit meiner Arbeit/<br>meinem Studium<br>bin ich zufrieden,<br>es soll möglichst<br>alles so bleiben wie<br>es ist.                                      | <input type="radio"/>  | <input type="radio"/>      | <input type="radio"/> | <input type="radio"/> | <input type="radio"/> |
| Meine Arbeit/<br>mein Studium<br>bringt mehr<br>Vorteile als<br>Nachteile.                                                                              | <input type="radio"/>  | <input type="radio"/>      | <input type="radio"/> | <input type="radio"/> | <input type="radio"/> |
| Mit meiner Arbeit/<br>meinem Studium<br>bin ich eher<br>unzufrieden,<br>deshalb versuche<br>ich neuen<br>Herausforderungen<br>aus dem Wege zu<br>gehen. | <input type="radio"/>  | <input type="radio"/>      | <input type="radio"/> | <input type="radio"/> | <input type="radio"/> |
| Mit meiner Arbeit/<br>meinem Studium<br>bin ich nicht<br>zufrieden, deshalb<br>unternehme ich<br>auch keine<br>Versuche mehr                            | <input type="radio"/>  | <input type="radio"/>      | <input type="radio"/> | <input type="radio"/> | <input type="radio"/> |

---

mich zu  
engagieren.

---

Bitte geben Sie an, ob die folgenden Aussagen auf Sie zutreffen (wahr) oder nicht auf Sie zutreffen (falsch).

*Wenn Sie sich nicht sicher sind, wählen Sie die Option aus, die eher auf Sie zutrifft. \**

Bitte wählen Sie die zutreffende Antwort für jeden Punkt aus:

|                                                                                                                                                           | wahr                  | falsch                |
|-----------------------------------------------------------------------------------------------------------------------------------------------------------|-----------------------|-----------------------|
| Ich finde es schwierig,<br>das Verhalten anderer<br>Leute zu imitieren.                                                                                   | <input type="radio"/> | <input type="radio"/> |
| Mein Verhalten ist<br>normalerweise ein<br>Ausdruck meiner wahren<br>inneren Gefühle,<br>Einstellungen und<br>Überzeugungen.                              | <input type="radio"/> | <input type="radio"/> |
| Bei Partys und sozialen<br>Zusammenkünften<br>versuche ich <u>nicht</u> , etwas<br>zu tun oder zu sagen, das<br>andere mögen.                             | <input type="radio"/> | <input type="radio"/> |
| Ich kann nur für eine<br>Idee argumentieren, an<br>die ich bereits glaube.                                                                                | <input type="radio"/> | <input type="radio"/> |
| Ich kann aus dem<br>Stegreif eine Rede<br>halten, sogar über<br>Themen, über die ich fast<br>keine Informationen<br>habe.                                 | <input type="radio"/> | <input type="radio"/> |
| Ich schätze, ich ziehe<br>eine Show ab, um Leute<br>zu beeindrucken oder zu<br>unterhalten.                                                               | <input type="radio"/> | <input type="radio"/> |
| Wenn ich in einer<br>sozialen Situation<br>unsicher bin, wie ich<br>mich verhalten soll, halte<br>ich nach Hinweisen im<br>Verhalten anderer<br>Ausschau. | <input type="radio"/> | <input type="radio"/> |

|                                                                                                                                            |                       |                       |
|--------------------------------------------------------------------------------------------------------------------------------------------|-----------------------|-----------------------|
| Ich wäre wahrscheinlich ein guter Schauspieler/eine gute Schauspielerin.                                                                   | <input type="radio"/> | <input type="radio"/> |
| Ich suche selten Rat bei meinen Freunden bei der Auswahl von Filmen, Büchern oder Musik.                                                   | <input type="radio"/> | <input type="radio"/> |
| Ich komme anderen manchmal so vor, als würde ich tiefere Emotionen empfinden.                                                              | <input type="radio"/> | <input type="radio"/> |
| Ich lache mehr, wenn ich eine Komödie mit anderen ansehe, als wenn ich sie alleine sehe.                                                   | <input type="radio"/> | <input type="radio"/> |
| In einer Gruppe von Leute stehe ich selten im Mittelpunkt.                                                                                 | <input type="radio"/> | <input type="radio"/> |
| In verschiedenen Situationen und mit verschiedenen Leuten verhalte ich mich häufig wie völlig verschiedene Personen.                       | <input type="radio"/> | <input type="radio"/> |
| Ich bin <u>nicht</u> besonders gut darin, andere Leute dazu zu bringen, mich zu mögen.                                                     | <input type="radio"/> | <input type="radio"/> |
| Sogar wenn ich mich <u>nicht</u> amüsiere, gebe ich oft vor Spaß zu haben.                                                                 | <input type="radio"/> | <input type="radio"/> |
| Ich bin <u>nicht</u> immer die Person, die ich vorgebe zu sein.                                                                            | <input type="radio"/> | <input type="radio"/> |
| Ich würde meine Meinung (oder die Weise, wie ich Dinge tue) nicht ändern, um jemandem zu gefallen oder die Gunst von jemandem zu gewinnen. | <input type="radio"/> | <input type="radio"/> |
| Ich habe darüber nachgedacht, Entertainer/Entertainerin zu werden.                                                                         | <input type="radio"/> | <input type="radio"/> |
| Um weiterzukommen und gemocht zu werden, neige ich dazu, mich zu                                                                           | <input type="radio"/> | <input type="radio"/> |

|                                                                                                                        |                       |                       |
|------------------------------------------------------------------------------------------------------------------------|-----------------------|-----------------------|
| verhalten, wie andere es von mir erwarten.                                                                             |                       |                       |
| Ich war nie gut in Spielen wie Scharaden oder improvisiertem Schauspiel.                                               | <input type="radio"/> | <input type="radio"/> |
| Ich habe Probleme damit, mein Verhalten zu verändern, um mich an verschiedene Leute und Situationen anzupassen.        | <input type="radio"/> | <input type="radio"/> |
| Auf Partys überlasse ich es anderen, Witze und Geschichten zu erzählen.                                                | <input type="radio"/> | <input type="radio"/> |
| Ich fühle mich in Gesellschaft ein wenig unbeholfen und zeige mich nicht ganz so wie ich sollte.                       | <input type="radio"/> | <input type="radio"/> |
| Ich kann jedem in die Augen sehen und eine Lüge mit ernsthaftem Gesicht erzählen (falls es für einen guten Zweck ist). | <input type="radio"/> | <input type="radio"/> |
| Ich kann Leute täuschen, indem ich mich freundlich zeige, auch wenn ich sie wirklich nicht leiden kann.                | <input type="radio"/> | <input type="radio"/> |

Bitte geben Sie an, inwieweit Sie den folgenden Aussagen zustimmen. \*

Bitte wählen Sie die zutreffende Antwort für jeden Punkt aus:

|                                                                              | stimmt nicht          | stimmt eher nicht     | stimmt eher           | stimmt genau          |
|------------------------------------------------------------------------------|-----------------------|-----------------------|-----------------------|-----------------------|
| Wenn sich Widerstände auftun, finde ich Mittel und Wege, mich durchzusetzen. | <input type="radio"/> | <input type="radio"/> | <input type="radio"/> | <input type="radio"/> |
| Die Lösung schwieriger Probleme                                              | <input type="radio"/> | <input type="radio"/> | <input type="radio"/> | <input type="radio"/> |

|                                                                                                                    |                       |                       |                       |                       |
|--------------------------------------------------------------------------------------------------------------------|-----------------------|-----------------------|-----------------------|-----------------------|
|                                                                                                                    |                       |                       |                       |                       |
| gelingt mir<br>immer, wenn<br>ich mich darum<br>bemühe.                                                            |                       |                       |                       |                       |
| Es bereitet mir<br>keine<br>Schwierigkeiten,<br>meine<br>Absichten und<br>Ziele zu<br>verwirklichen.               | <input type="radio"/> | <input type="radio"/> | <input type="radio"/> | <input type="radio"/> |
| In unerwarteten<br>Situationen<br>weiß ich immer,<br>wie ich mich<br>verhalten soll.                               | <input type="radio"/> | <input type="radio"/> | <input type="radio"/> | <input type="radio"/> |
| Auch bei<br>überraschenden<br>Ereignissen<br>glaube ich, dass<br>ich gut mit<br>ihnen<br>zurechtkommen<br>kann.    | <input type="radio"/> | <input type="radio"/> | <input type="radio"/> | <input type="radio"/> |
| Schwierigkeiten<br>sehe ich<br>gelassen<br>entgegen, weil<br>ich meinen<br>Fähigkeiten<br>immer<br>vertrauen kann. | <input type="radio"/> | <input type="radio"/> | <input type="radio"/> | <input type="radio"/> |
| Was auch<br>immer passiert,<br>ich werde schon<br>klar kommen.                                                     | <input type="radio"/> | <input type="radio"/> | <input type="radio"/> | <input type="radio"/> |
| Für jedes<br>Problem kann<br>ich eine Lösung<br>finden.                                                            | <input type="radio"/> | <input type="radio"/> | <input type="radio"/> | <input type="radio"/> |
| Wenn eine neue<br>Sache auf mich<br>zukommt, weiß<br>ich, wie ich<br>damit umgehen<br>kann.                        | <input type="radio"/> | <input type="radio"/> | <input type="radio"/> | <input type="radio"/> |
| Wenn ein<br>Problem auf<br>mich zukommt,                                                                           | <input type="radio"/> | <input type="radio"/> | <input type="radio"/> | <input type="radio"/> |

---

habe ich meist  
mehrere Ideen,  
wie ich es lösen  
kann.

---

Vielen Dank für Ihre Teilnahme!
